# Supplementary material for: Tumor macrophages are pivotal constructors of tumor collagenous matrix
Source: PubMed Central journal article supplement — J Exp Med. 2016 Oct 17;213(11):2315–31. doi: 10.1084/jem.20151193 (PMC5068227; doi:10.1084/jem.20151193), 2016-10-17
Supplement: JEM_20151193_sm.pdf [file JEM_20151193_sm.pdf]

SUPPLEMENTAL MATERIAL

Afik et al., <http://dx.doi.org/10.1084/jem.20151193>

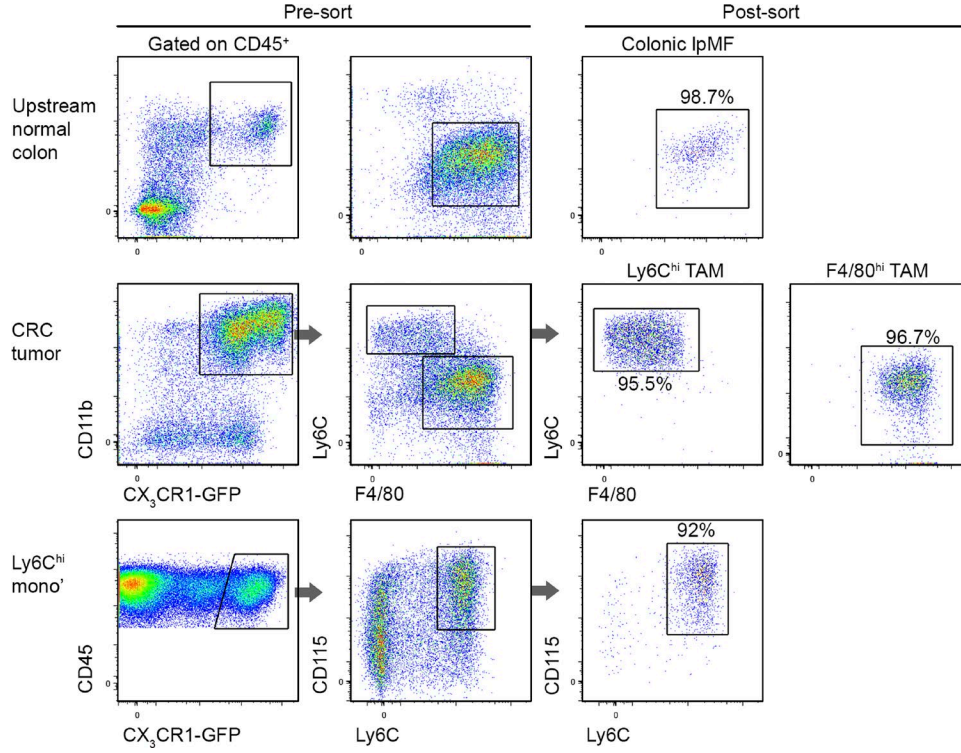

Figure S1. **Sorting strategy of Ly6C<sup>hi</sup> monocytes, colonic IpMFs, and CRC TAMs.** Representative flow cytometry images showing the strategy that was implemented for the sorting of colonic IpMFs (top), Ly6C<sup>hi</sup> and F4/80<sup>hi</sup> TAM subsets from CRC tumors (middle), and of Ly6C<sup>hi</sup> monocytes (mono') from the spleen (bottom). Purity degree is mentioned in percentage for each cell population.

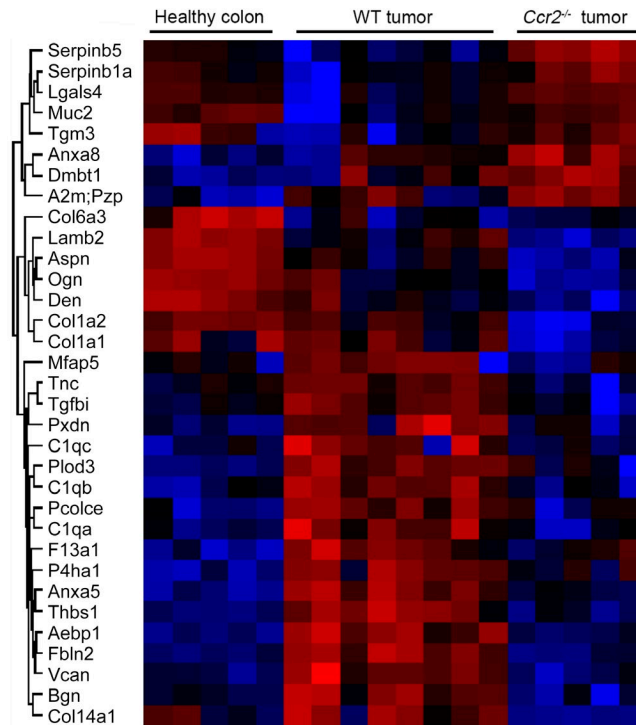

Figure S2. **CRC tumors acquire a unique ECM protein signature in comparison with healthy upstream colon that is altered in the absence of TAMs.** Color-coded heat map showing 31 ECM-related proteins that were differentially expressed between healthy upstream colon and CRC tumors, as well as between WT and *Ccr2*<sup>-/-</sup> tumors. Of note, collagens I  $\alpha$ 1 and  $\alpha$ 2 were not significantly changed between healthy colon and WT tumors but were added into this heat map. Data were analyzed by unpaired, two-tailed Student's *t* test analysis (pFDR = 0.05) and were z scored. Each column represents a biological repeat ( $n = 5$  for normal colon,  $n = 8$  for WT tumor, and  $n = 5$  for *Ccr2*<sup>-/-</sup> tumors).

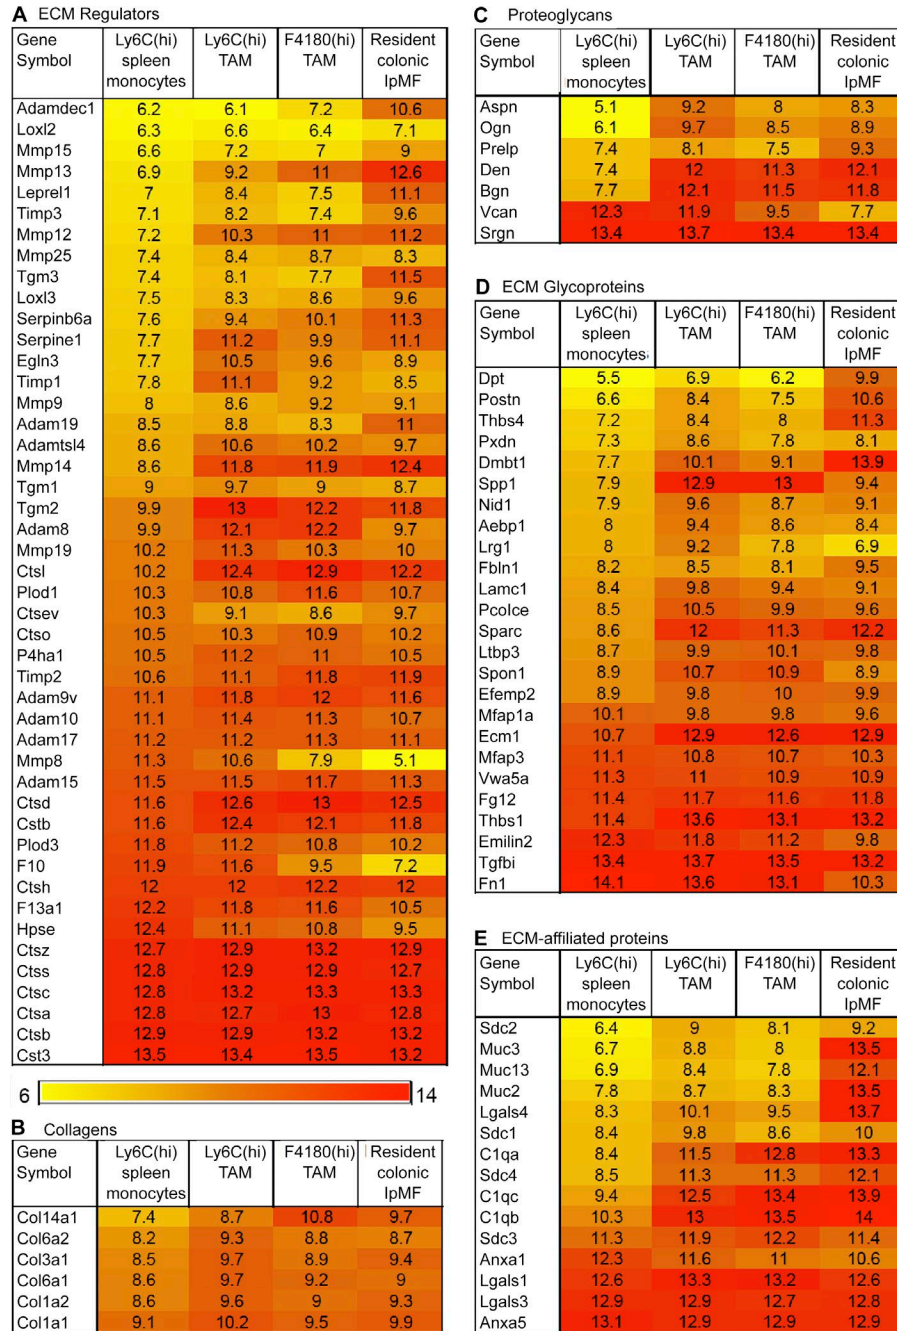

Figure S3. **TAMs express a unique signature of ECM-related genes.** (A–E) Affymetrix gene array heat map analyses showing the differential raw expression level of ECM-related genes of sorted Ly6C<sup>hi</sup> and F4/80<sup>hi</sup> TAMs (day-14 tumors) in comparison with their Ly6C<sup>hi</sup> monocyte precursors (splenic reservoir) and colonic IpMFs sorted from upstream normal colonic mucosa. ECM genes are categorized as ECM regulators (A), collagens (B), proteoglycans (C), glycoproteins (D), and ECM-affiliated proteins (E). Values are presented as ( $\log_2$ ) gene expression average of two biological repeats, each performed from a pool of mice ( $n = 5$  for splenic monocytes, and  $n \geq 10$  for TAMs and colonic IpMFs).

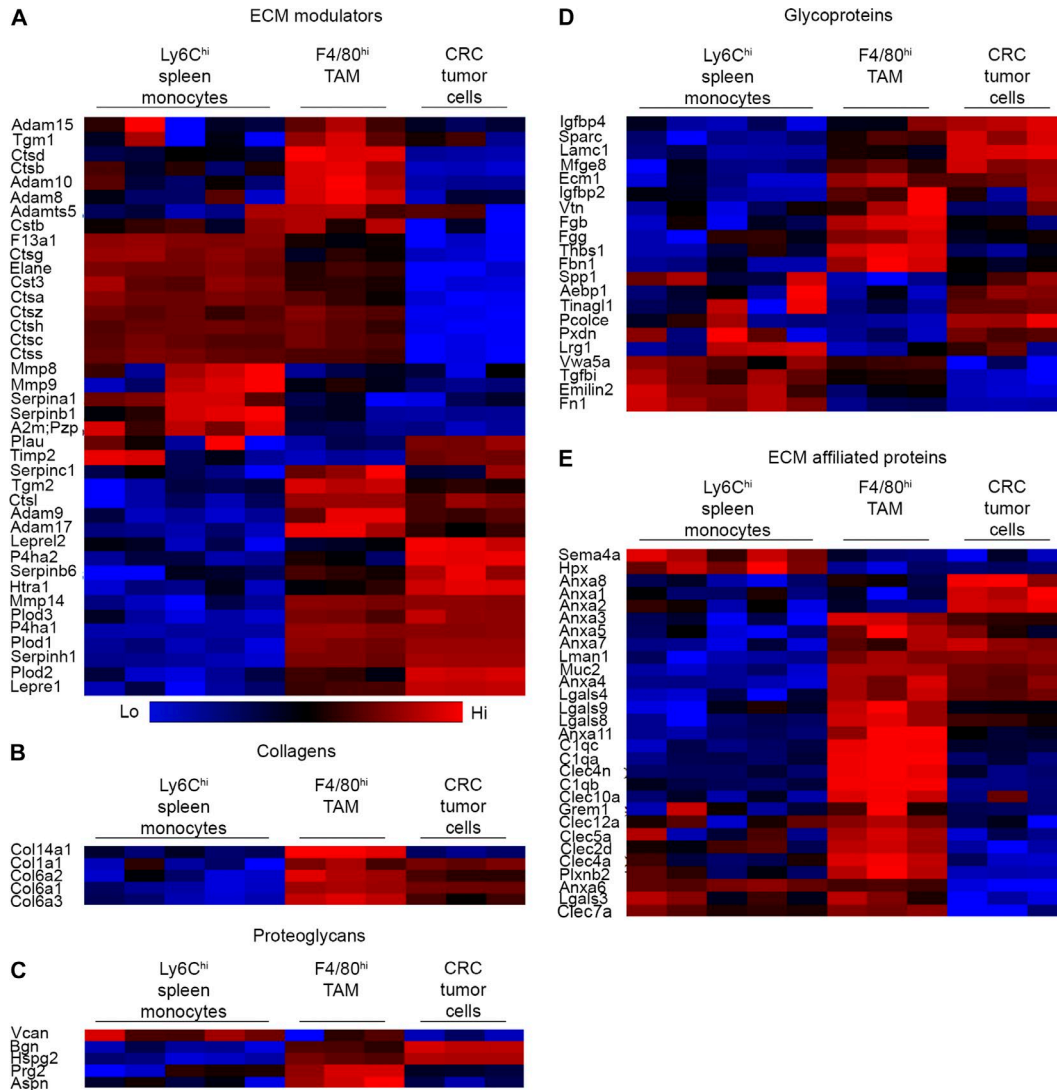

Figure S4. **Proteomic profiling of sorted F4/80<sup>hi</sup> TAMs in comparison with their Ly6C<sup>hi</sup> monocyte precursors and colocalizing CRC tumor cells.** (A–E) Color-coded heat maps presenting ECM-related proteins found by LC-MS/MS analysis to be significantly and differentially expressed in sorted F4/80<sup>hi</sup> TAMs in comparison with their Ly6C<sup>hi</sup> monocyte precursors and colocalizing colorectal tumor cells. For Ly6C<sup>hi</sup> monocytes, five biological repeats were performed; each was extracted from a pool of three mice. For F4/80<sup>hi</sup> TAMs and CRC tumor cells, three biological repeats were performed; each was extracted from a pool of five mice. Data were analyzed by unpaired, two-tailed Student’s *t* tests (pFDR = 0.05), *z* scored, and divided into the following categories: ECM modulators (A), collagens (B), proteoglycans (C), glycoproteins (D), and ECM-affiliated proteins (E).

Table S1 is included as an Excel file and shows a Goeast function enrichment analyses of the differentially expressed genes between Ly6C<sup>hi</sup> TAMs and resident colonic IpMFs and between F4/80<sup>hi</sup> TAMs and resident colonic IpMFs.

Table S2 is included as an Excel file and shows a David function enrichment analyses of the differentially expressed genes between Ly6C<sup>hi</sup> TAMs and resident colonic IpMFs and between F4/80<sup>hi</sup> TAMs and resident colonic IpMFs.

Table S3 is included as an Excel file and shows an Ingenuity pathway analysis of the differentially expressed genes between F4/80<sup>hi</sup> TAMs and resident colonic IpMFs.
